# Supplementary material
Source: PubMed Central journal article supplement (PMC10119552)
Supplement: mmc1.pdf [file mmc1.pdf]

# THE LANCET

## Supplementary appendix

This appendix formed part of the original submission. We post it as supplied by the authors.

Supplement to: Al M, Levison S, Berdel WE, Zerlang Andersen D, for the Decentralised Clinical Trials Task Force. Decentralised elements in clinical trials: recommendations from the European Medicines Regulatory Network . *Lancet* 2023; **401**: 1339.

## Supplemental Material - Appendix

### DECENTRALISED ELEMENTS IN CLINICAL TRIALS: RECOMMENDATIONS FROM THE EUROPEAN MEDICINES REGULATORY NETWORK

Members of DCT Task Force drafting the 'Recommendation paper on decentralised elements in clinical trials': [https://health.ec.europa.eu/system/files/2022-12/mp\\_decentralised-elements\\_clinical-trials\\_rec\\_en.pdf](https://health.ec.europa.eu/system/files/2022-12/mp_decentralised-elements_clinical-trials_rec_en.pdf).

| <b>Name of representative per working group</b> | <b>Affiliation</b>                                                                            | <b>E-mail</b>                                              |
|-------------------------------------------------|-----------------------------------------------------------------------------------------------|------------------------------------------------------------|
| <b>Project management</b>                       |                                                                                               |                                                            |
| Ditte Zerlang Andersen                          | Danish Medicines Agency, DKMA                                                                 | dizc@dkma.dk                                               |
| Stina Lofling                                   | Swedish medical products agency                                                               | stina.lofling@lakemedelsverket.se                          |
| <b>Clinical Trial Coordination Group (CTCG)</b> |                                                                                               |                                                            |
| Claudia Riedel                                  | Federal Institute for Drugs and Medical Devices, BfArM                                        | Claudia.Riedel@bfarm.de                                    |
| Diego Alejandro Dri                             | Italian Medicines Agency, AIFA                                                                | da.dri@aifa.gov.it                                         |
| Elke Stahl                                      | Federal Institute for Drugs and Medical Devices, BfArM                                        | Elke.Stahl@bfarm.de                                        |
| Frederik Grell Nørgaard                         | Danish Medicines Agency, DKMA                                                                 | frgr@dkma.dk                                               |
| Giovanni Affronti                               | Italian Medicines Agency, AIFA                                                                | g.affronti@aifa.gov.it                                     |
| Greet Musch                                     | Italian Medicines Agency, AIFA                                                                | greet.musch@fagg-afmps.be                                  |
| Isabel Sánchez Afán de Rivera                   | Spanish Agency of Medicines and Medical Devices                                               | msanchezaf@aemps.es                                        |
| José Valenzuela Mendoza                         | Spanish Agency of Medicines and Medical Devices                                               | jvalenzuela@aemps.es                                       |
| Marianne Lunzer                                 | Austrian Medicines and Medical Devices Agency                                                 | marianne.lunzer@ages.at                                    |
| Maurizio Massella                               | Italian Medicines Agency, AIFA                                                                | m.massella@aifa.gov.it                                     |
| Monique Al                                      | Central Committee on Research Involving Human Subjects – NL                                   | m.al@ccmo.nl                                               |
| Solange Levison                                 | Central Committee on Research Involving Human Subjects – NL                                   | s.levison@ccmo.nl                                          |
| Mårten Wendt                                    | Swedish medical products agency                                                               | marten.wendt@mpa.se                                        |
| <b>Clinical Trial Expert Group (CTEG)</b>       |                                                                                               |                                                            |
| Bertold Renner                                  | Technische Universität Dresden, Germany                                                       | bertold.renner@tu-dresden.de<br>ORCID: 0000-0003-0845-6793 |
| Kasper Bendix Johnsen                           | Danish National Center for Ethics                                                             | KJO@DKETIK.DK                                              |
| Katelijne Anciaux                               | CT-College of the Belgian Federal Public Service of Health, Food chain safety and Environment | ct.college@health.fgov.be                                  |
| Pierre-Henri Bertoye                            | National Commission on Human Research (CNRIH), Ministry of Health                             | phb_pro@outlook.com                                        |
| Ruth Storme                                     | Ethics Committee Research UZ Leuven                                                           | ruth.storme@uzleuven.be                                    |
| Wolfgang E. Berdel                              | University Hospital Muenster, Germany and Association of Medical Ethics Committees in Germany | berdel@uni-muenster.de                                     |
| <b>GCP Inspector Working Group (GCP IWG)</b>    |                                                                                               |                                                            |
| Peter Twomey                                    | EMA Inspections Office                                                                        | gcp@ema.europa.eu                                          |
| Dong Ho Kim Pietsch                             | EMA Inspections Office/ DE-PEI                                                                | gcp@ema.europa.eu                                          |

|                                                                                          |                                                                                                           |                                                    |
|------------------------------------------------------------------------------------------|-----------------------------------------------------------------------------------------------------------|----------------------------------------------------|
| Bärbel Witte                                                                             | Federal Institute for Drugs and Medical Devices, BfArM                                                    | Baerbel.Witte@bfarm.de                             |
| Camelia Mihaescu                                                                         | EMA Inspections Office                                                                                    | gcp@ema.europa.eu                                  |
| Cécile Henrot                                                                            | EMA Inspections Office                                                                                    | gcp@ema.europa.eu                                  |
| Dea Gowers Klauber                                                                       | Danish Medicines Agency, DKMA                                                                             | degk@dkma.dk                                       |
| Fabrizio Galliccia                                                                       | Italian Medicines Agency, AIFA                                                                            | f.galliccia@aifa.gov.it                            |
| Gabriele Schwarz                                                                         | Federal Institute for Drugs and Medical Devices, BfArM                                                    | Gabriele.Schwarz@bfarm.de                          |
| Helene Blok                                                                              | Health and Youth care Inspectorate (IGJ)                                                                  | gcp@igj.nl                                         |
| Katrin Tagel                                                                             | State Agency of Medicines – EE                                                                            | Katrin.Tagel@ravimiamet.ee                         |
| Lisbeth Bregnhøj                                                                         | Danish Medicines Agency, DKMA                                                                             | lib@dkma.dk                                        |
| Matthias Loibl                                                                           | Austrian Medicines and Medical Devices Agency                                                             | matthias.loibl@ages.at                             |
| Norah Cassidy                                                                            | Health Products Regulatory Authority                                                                      | norah.cassidy@hpra.ie                              |
| Paola di Basilio                                                                         | Italian Medicines Agency, AIFA                                                                            | p.dibasilio@aifa.gov.it                            |
| Sarah Tkindt                                                                             | Federal Agency for Medicines and Health Products, FAMHP                                                   | sarah.tkindt@fagg.be                               |
| Susy Yeshika Olave Quispe                                                                | Spanish Agency of Medicines and Medical Devices, AEMPS                                                    | solave@aemps.es                                    |
| Tiina Holmberg                                                                           | Finnish Medicines Agency, FIMEA                                                                           | Tiina.Holmberg@fimea.fi                            |
| <b>Scientific advice working party (SAWP)</b>                                            |                                                                                                           |                                                    |
| Larissa Higgins                                                                          | Health Products Regulatory Authority                                                                      | larissa.higgins@hpra.ie                            |
| Minne Casteels                                                                           | KU Leuven, Dept. of Pharmaceutical and Pharmacological Sciences                                           | minne.casteels@kuleuven.be                         |
| <b>Paediatric Committee (PDCO) and Enpr-EMA, European network of paediatric research</b> |                                                                                                           |                                                    |
| Dominik Karres                                                                           | EMA, Paediatric Medicines Office                                                                          | dominik.karres@ema.europa.eu                       |
| Laura Fregonese                                                                          | EMA, Paediatric Medicines Office                                                                          | Laura.Fregonese@ema.europa.eu                      |
| Luca Sangiorgi                                                                           | Enpr-EMA, European Reference Networks                                                                     | luca.sangiorgi@ior.it                              |
| Thierry Lacaze                                                                           | Maternal Infant Child & Youth Research Network (MICYRN), Canada                                           | Thierry.Lacaze-Masmonteil@albertahealthservices.ca |
| <b>Methodology Working Party (MWP)</b>                                                   |                                                                                                           |                                                    |
| Florian Lasch                                                                            | EMA, Data Analytics and Methods Task Force                                                                | florian.lasch@ema.europa.eu                        |
| <b>Healthcare Professionals' Working Party (HCPWP)</b>                                   |                                                                                                           |                                                    |
| Gualberto Gussoni                                                                        | FADOI (Italian Scientific Society of Internal Medicine) & EFIM (European Federation of Internal Medicine) | gualberto.gussoni@gmail.com                        |
| Vasileios Sakalis                                                                        | Hippokrateion General Hospital of Thessaloniki, Greece                                                    | vsakkalis@hotmail.com                              |
| <b>Patients' and Consumers' Working Party (PCWP)</b>                                     |                                                                                                           |                                                    |
| Aisling Walsh-Papageorgiou                                                               | European Foundation for the Care of Newborn Infants (EFCNI)                                               | Aisling.Walsh@efcni.org                            |
| Francois Houyez                                                                          | EURODIS, Rare Diseases Europe                                                                             | francois.houyez@eurordis.org                       |
| Johanna Kostenzer                                                                        | European Foundation for the Care of Newborn Infants (EFCNI)                                               | johanna.kostenzer@efcni.org                        |
| Sally Hofmeister                                                                         | World Duchenne Organization                                                                               | sally.hofmeister@worldduchenne.org                 |

More information on ACT EU Multi-stakeholder Meeting on Decentralised Clinical Trials, 4 October 2022 (event summary, documents and video recording):

<https://www.ema.europa.eu/en/events/act-eu-multi-stakeholder-meeting-decentralised-clinical-trials>
